# Supplementary material for: CO2-responsive self-healable hydrogels based on hydrophobically-modified polymers bridged by wormlike micelles
Source: Royal Society of Chemistry journal article supplement (doi:10.1039/c7ra06418g), 2017-01-01
Supplement: c7ra06418g1.pdf [file c7ra06418g1.pdf]

## CO<sub>2</sub>-responsive self-healable hydrogels based on hydrophobically-modified polymers bridged by wormlike micelles

Chunming Xiong,<sup>a</sup> Kang Peng,<sup>b</sup> Xiaofen Tang,<sup>a</sup> Zhengrong Ye,<sup>a</sup> Yang Shi<sup>a</sup> and Haiyang Yang<sup>\*b</sup>

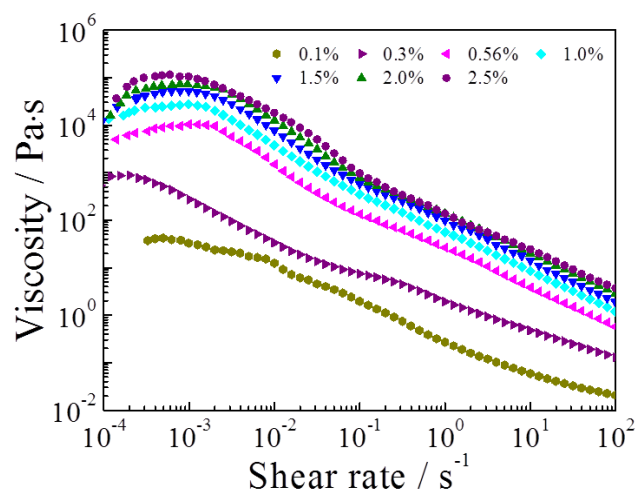

Figure S1. Viscosity *versus* shear rate plots for the HMPAM hydrogel with various polymer weight percentages.

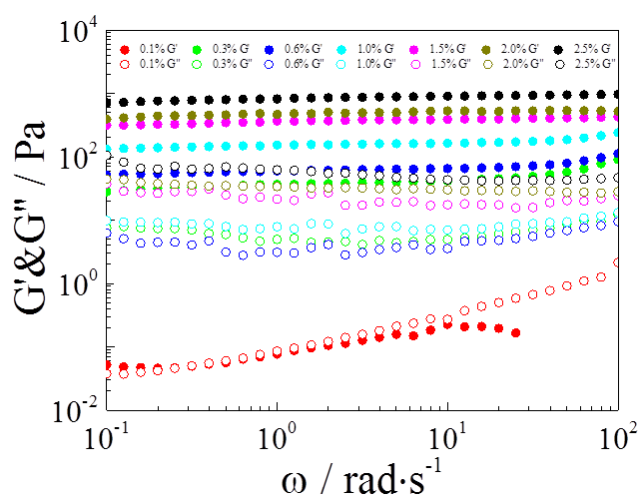

Figure S2. Linear viscoelastic modulus, G'(ω) and G''(ω), for the HMPAM hydrogel with various polymer weight percentages.

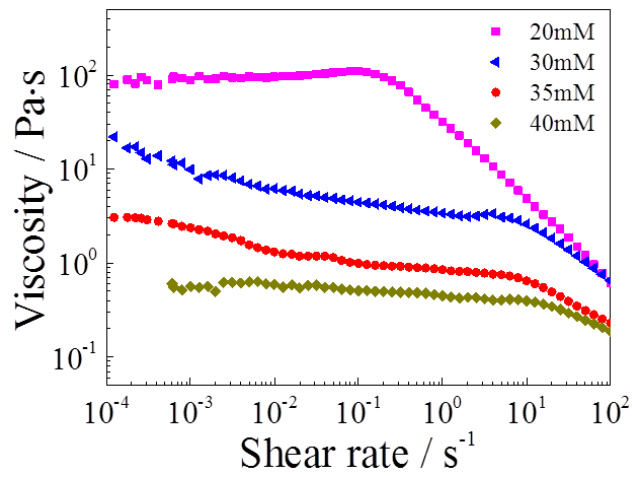

Figure S3. Viscosity *versus* shear rate plots for the HMPAM hydrogel with various concentrations of SDS/TMPDA before bubbling CO<sub>2</sub>.

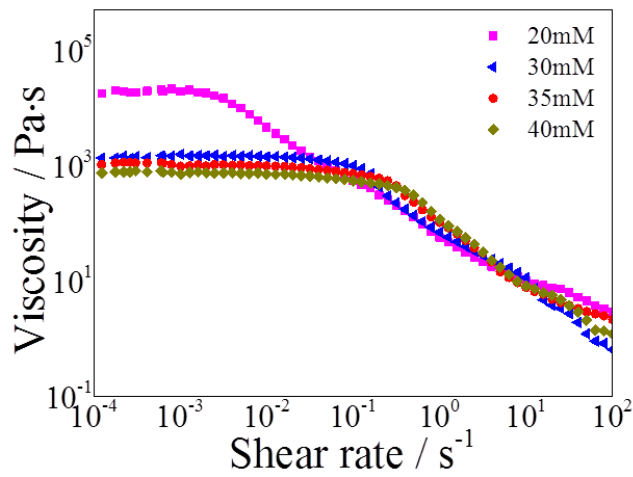

Figure S4. Viscosity *versus* shear rate plots for the HMPAM hydrogel with various concentrations of SDS/TMPDA after bubbling CO<sub>2</sub>.

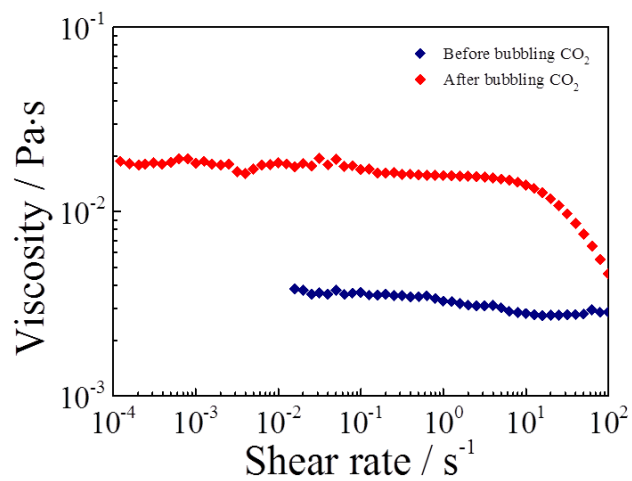

Figure S5. Viscosity *versus* shear rate plots for 35mM SDS/TMPDA solution before and after bubbling CO<sub>2</sub>.

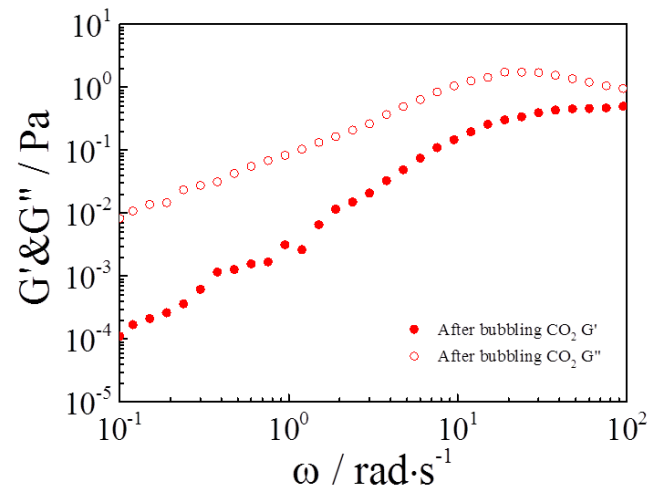

Figure S6. Linear viscoelastic modulus,  $G'(\omega)$  and  $G''(\omega)$ , for 35mM SDS/TMPDA solution after bubbling  $\text{CO}_2$ .
